# Supplementary material for: DECIDE: a cluster randomized controlled trial to reduce non-medically indicated caesareans in Burkina Faso
Source: Springer Nature journal article supplement (doi:10.1186/s12884-016-1112-8), 2016-10-21

## Algorithm : ECLAMPSIA

**ECLAMPSIA: Diastolic Blood Pressure (DBP)  $\geq$  90 mmHg and Proteinuria  $>$  0.3 g / l (two crosses) associated with seizures**

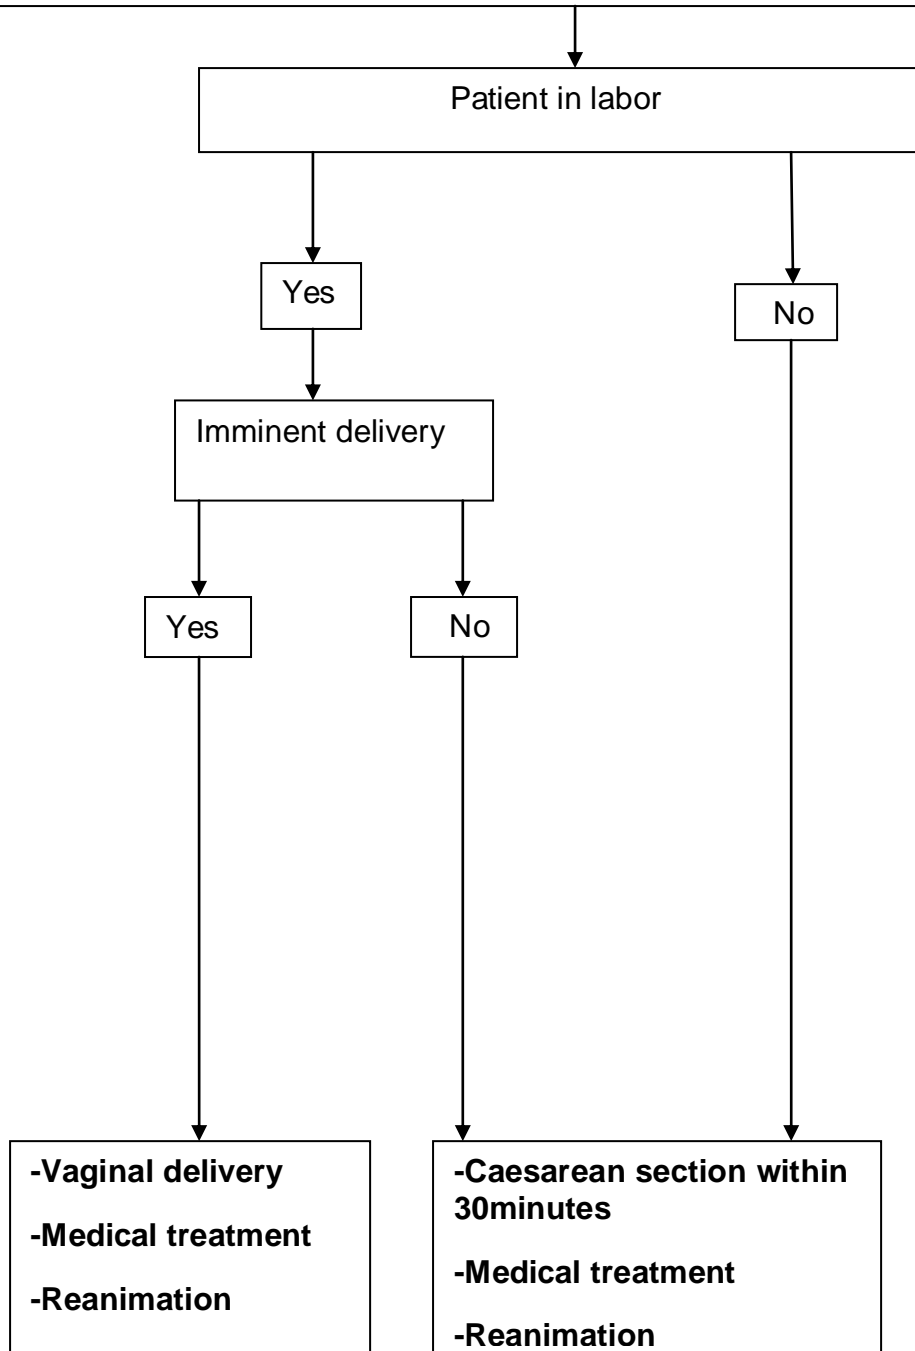

Supplement: MOESM2 [file 10937822]
