# Supplementary material for: DECIDE: a cluster randomized controlled trial to reduce non-medically indicated caesareans in Burkina Faso
Source: Springer Nature journal article supplement (doi:10.1186/s12884-016-1112-8), 2016-10-21
Supplement: MOESM6 [file 10937822]

# Algorithm: Contra-indications to vaginal delivery

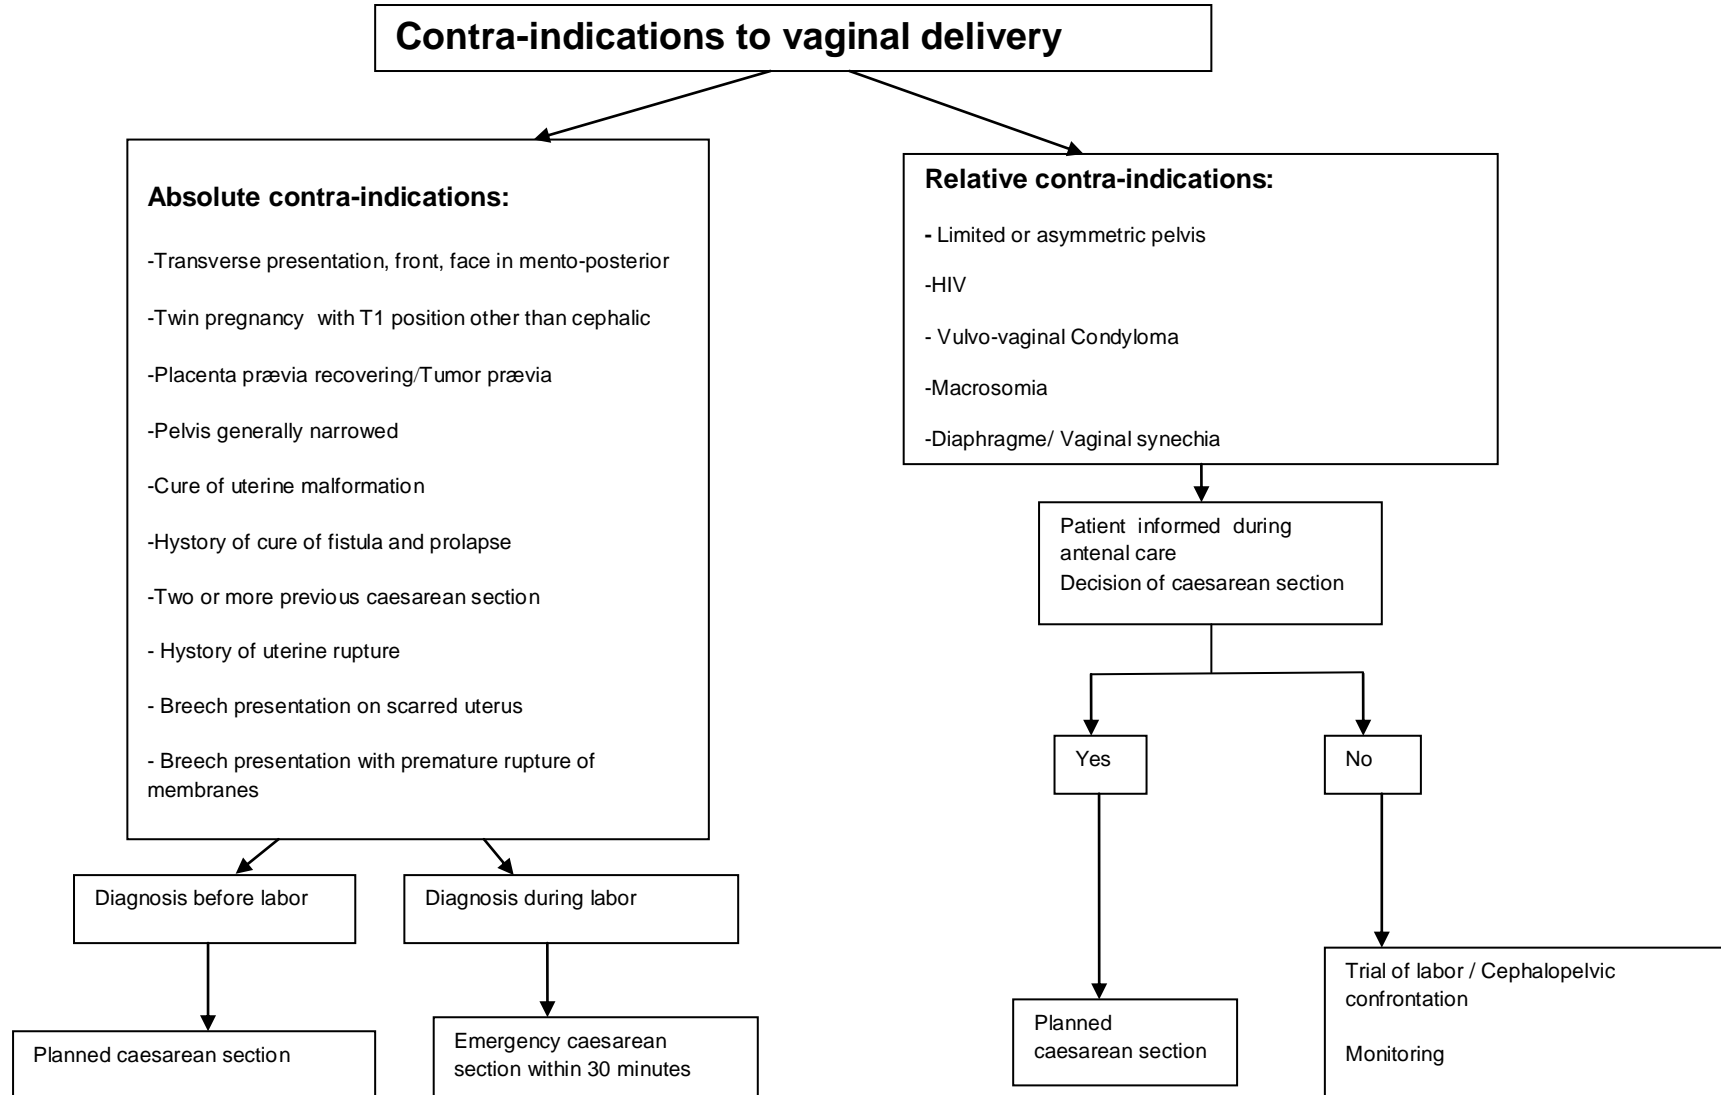

Source: QUARISMA trial (Nils Chaillet) and opinions of the group of experts
